# Supplementary material for: Fexofenadine Suppresses Delayed-Type Hypersensitivity in the Murine Model of Palladium Allergy
Source: MDPI journal article supplement (doi:10.3390/ijms18071357), 2017-06-25
Supplement: s1 [file s1]

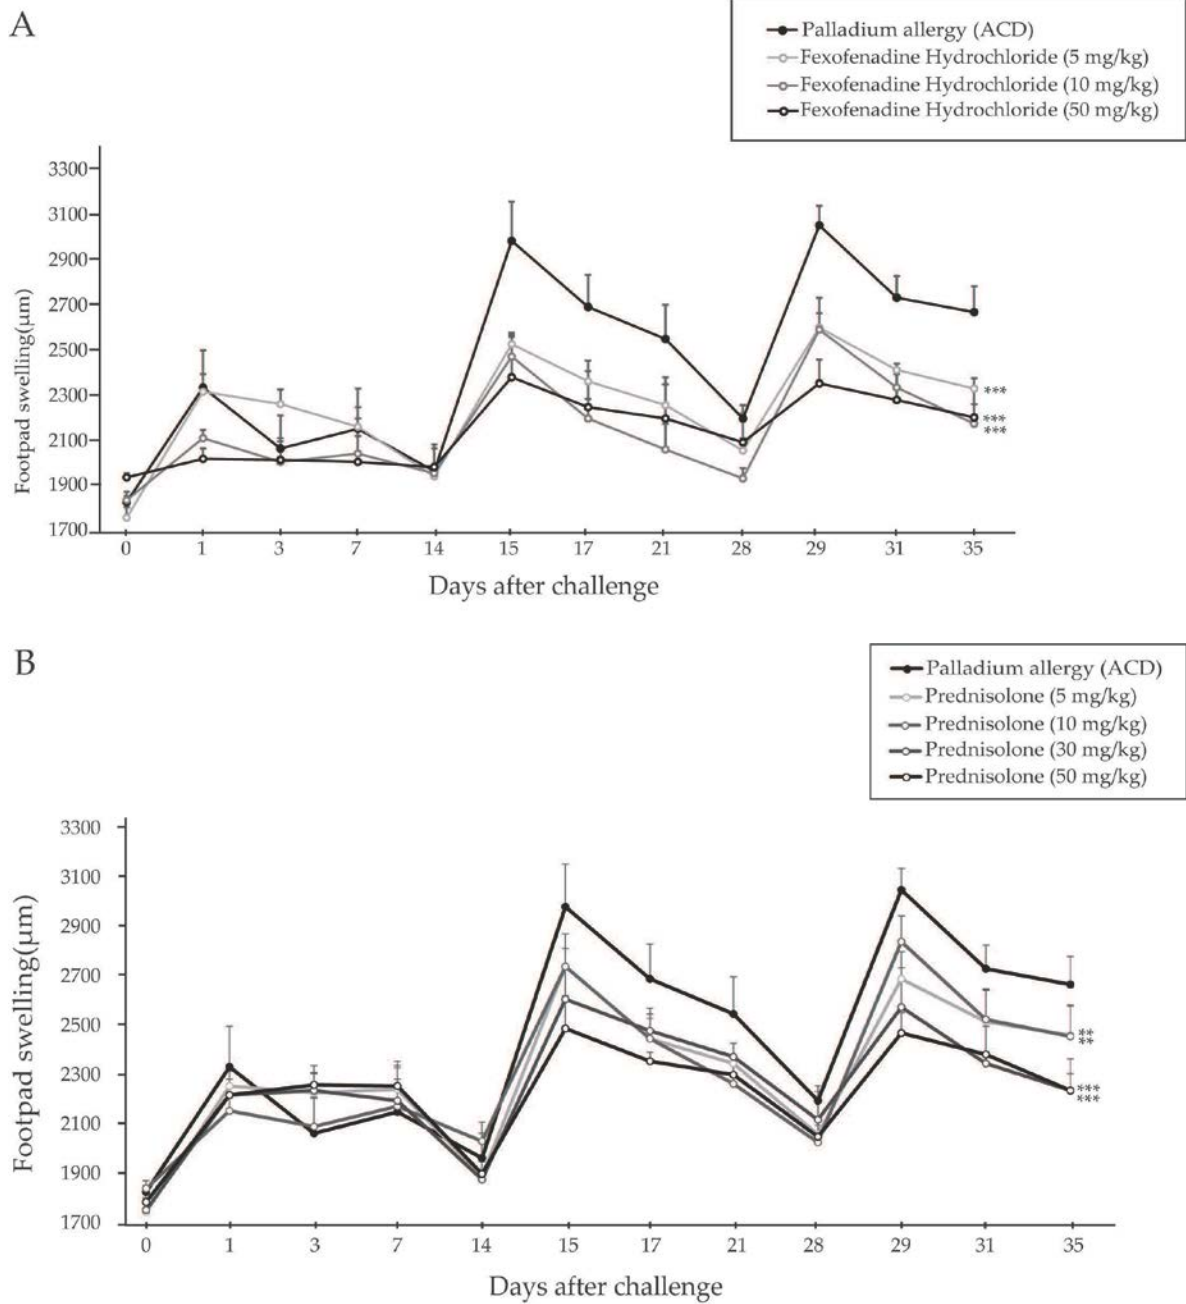

**Figure S1.** Footpad swelling at each dose of fexofenadine hydrochloride and prednisolone in the Pd-induced ACD mice. The dose of fexofenadine (5mg/kg) showed the suppression of footpad swelling, but the dose of fexofenadine (10mg/kg) had more effective for suppression in Pd-induced ACD mice (A). Otherwise, the dose of prednisolone (5mg/kg) was not enough to suppress Pd-induced ACD mice after the first and second challenges (B). Bars and error bars indicate the mean + standard deviation (SD). \*  $p < 0.05$  is considered as significant, \*\*  $p < 0.01$  is considered as very significant, and \*\*\*  $p < 0.001$  is considered as extremely significant.

prednisolone 30mg/kg

prednisolone 50mg/kg

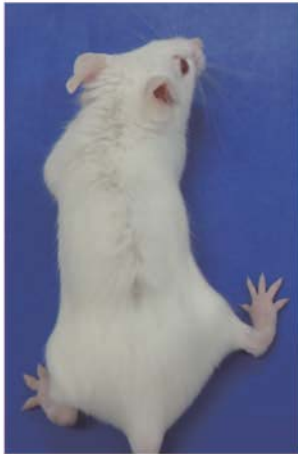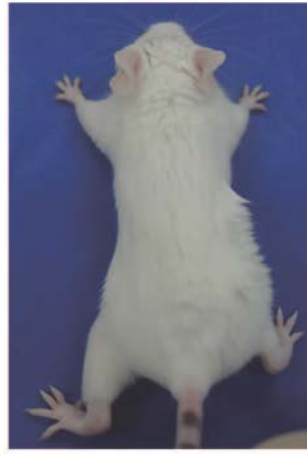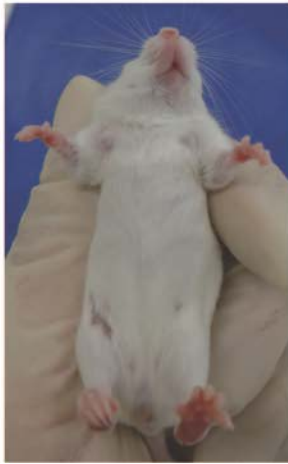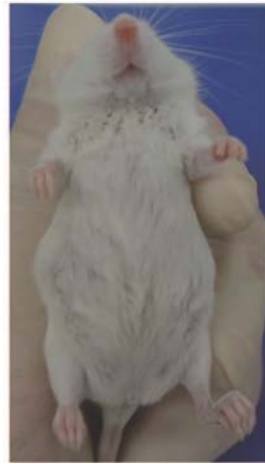

**Figure 2.** Macroscopic findings of Pd-induced allergic mice treated with high dose prednisolone. Pd-induced ACD mice treated with prednisolone at 30mg/kg and 50mg/kg show the bad fur condition.
